# Supplementary material for: Expression of CD64 on Circulating Neutrophils Favoring Systemic Inflammatory Status in Erythema Nodosum Leprosum
Source: PLOS journal article supplement (doi:10.1371/journal.pntd.0004955), 2016-08-24
Supplement: S9 (10.1371/journal.pntd.0004955.s009) [file journal.pntd.0004955.s009]

**S7 Table**

| Patient<br>code | Temperature <sup>1</sup> | Number of<br>nodules <sup>2</sup> | Localization<br>of nodules <sup>3</sup> | Peripheral<br>edema <sup>4</sup> | SS <sup>5</sup> | Leukogram<br>(Total cells/mm <sup>3</sup> ) | ENL<br>classification | PMN CD64<br>index |
|-----------------|--------------------------|-----------------------------------|-----------------------------------------|----------------------------------|-----------------|---------------------------------------------|-----------------------|-------------------|
| ENL67           | 3                        | 2                                 | 1                                       | 0                                | 3               | 20250                                       | Moderate              | 1.81              |
| ENL90           | 0                        | 3                                 | 1                                       | 2                                | 3               | 13770                                       | Severe                | 2.02              |
| ENL2            | 0                        | 3                                 | 3                                       | 1                                | 3               | 16040                                       | Severe                | 3.28              |
| ENL12           | 0                        | 3                                 | 1                                       | 0                                | 3               | 11530                                       | Severe                | 1.32              |
| ENL15           | 3                        | 3                                 | 1                                       | 1                                | 3               | 13350                                       | Severe                | 7.92              |
| ENL16           | 0                        | 1                                 | 1                                       | 0                                | 3               | 7680                                        | Moderate              | 1.60              |
| ENL37           | 0                        | 3                                 | 3                                       | 2                                | 3               | n.d.                                        | Severe                | 4.93              |
| ENL46           | 2                        | 3                                 | 3                                       | 2                                | 2               | 11570                                       | Severe                | 2.40              |

|        |   |   |   |   |   |       |          |      |
|--------|---|---|---|---|---|-------|----------|------|
| ENL50  | 0 | 3 | 1 | 0 | 0 | 9040  | Mild     | 1.38 |
| ENL69  | 0 | 1 | 1 | 1 | 2 | 6330  | Moderate | 1.72 |
| ENL63  | 0 | 1 | 2 | 3 | 3 | 12440 | Moderate | 1.39 |
| ENL75  | 0 | 3 | 2 | 0 | 3 | 8370  | Moderate | 1.64 |
| ENL76  | 0 | 3 | 1 | 2 | 3 | 18490 | Severe   | 3.62 |
| ENL109 | 2 | 3 | 1 | 0 | 3 | 13780 | Severe   | 3.20 |
| ENL108 | 3 | 3 | 3 | 2 | 3 | 4730  | Moderate | 1.17 |
| ENL110 | 0 | 3 | 1 | 1 | 3 | n.d.  | Moderate | 1.99 |
| ENL111 | 2 | 3 | 1 | 3 | 3 | 7040  | Moderate | 1.23 |
| ENL112 | 0 | 1 | 1 | 0 | 1 | n.d.  | Mild     | 0.91 |
| ENL114 | 0 | 3 | 3 | 0 | 3 | n.d.  | Severe   | 3.19 |

|        |   |   |   |   |   |       |          |      |
|--------|---|---|---|---|---|-------|----------|------|
| ENL126 | 1 | 3 | 3 | 0 | 3 | n.d.  | Severe   | 8.10 |
| ENL7   | 0 | 1 | 1 | 2 | 3 | n.d.  | Moderate | 0.83 |
| ENL96  | 1 | 1 | 2 | 0 | 3 | 12070 | Moderate | 1.71 |

**Clinical features of ENL.** Legend: SS= Systemic symptomatology. <sup>1</sup>Score: 0 = 37.5° C or less; 1 = No fever at the moment but reported fever in the last 7 days; 2 = 37.6-38.5° C; 3 = 38.6 or more. <sup>2</sup>Score: 0 = 0; 1= 1-10; 2= 11-20; 3 = 21 or more. <sup>3</sup>Score: 0 = absent; 1 = 1-2 regions; 2 = 3-4 regions; 3 = 5-7 regions. <sup>4</sup>Score: 0 = absent; 1 = 1 site of hands or feet or face; 2 = 2 sites; 3 = All 3 sites (hands, feet and face). <sup>5</sup>Score: 0 = absent, 1 = 1 systemic symptom; 2 = 2 systemic symptoms; 3 = 3 or more systemic symptoms.
